# Supplementary material
Source: PubMed Central journal article supplement (PMC3447784)
Supplement: supp_blood-2012-02-414425_blood-2012-02-414425-1.pdf [file supp_blood-2012-02-414425_blood-2012-02-414425-1.pdf]

**Supplementary Information for:****CD25 Expression Status Improves Prognostic Risk Classification in AML****Independent of Established Biomarkers: ECOG Phase III Trial, E1900.**

**Mithat Gönen<sup>1\*</sup>, Zhuoxin Sun<sup>2</sup>, Maria E. Figueroa<sup>3</sup>, Jay P. Patel<sup>4</sup>, Omar Abdel-Wahab<sup>4,9</sup>, Janis Racevskis<sup>5</sup>, Rhett P. Ketterling<sup>6</sup>, Hugo Fernandez<sup>7</sup>, Jacob M. Rowe<sup>8</sup>, Martin S. Tallman<sup>9</sup>, Ari Melnick<sup>10</sup>, Ross L. Levine<sup>4,9</sup>, and Elisabeth Paietta<sup>5\*</sup>**

<sup>1</sup> Department of Epidemiology and Biostatistics, Memorial Sloan Kettering Cancer Center, New York, NY

<sup>2</sup> Department of Biostatistics, Dana Farber Cancer Institute, Boston, MA

<sup>3</sup> Department of Pathology, University of Michigan, Ann Arbor, MI

<sup>4</sup> Human Pathology and Pathogenesis Program, Memorial Sloan Kettering Cancer Center, New York, NY

<sup>5</sup> Department of Oncology, Montefiore Medical Center, Albert Einstein College of Medicine, Bronx, NY

<sup>6</sup> Department of Laboratory Medicine and Pathology, Mayo Clinic, Rochester, MN

<sup>7</sup> Department of Blood and Bone Marrow Transplantation, Moffitt Cancer Center, Tampa, FL

<sup>8</sup> Shaare Zedek Medical Center, Jerusalem, and Technion, Haifa, Israel.

<sup>9</sup> Leukemia Service, Department of Medicine, Memorial Sloan Kettering Cancer Center, New York, NY

<sup>10</sup> Department of Medicine, Hematology/Oncology Division, Weill Cornell Medical College, New York, NY

\* These authors contributed equally to this report

Corresponding Author: Elisabeth Paietta, Ph.D.

Montefiore Medical Center-North Division, Albert Einstein  
College of Medicine, Bronx, NY 10466

Tel (718) 920-9520, Fax (718) 920-1161

e-mail: [epaietta@earthlink.net](mailto:epaietta@earthlink.net)

Running Head: Prognostication in Adult AML Based on CD25 Expression and Genetics

## Supplemental Tables

**Supplemental Table 1:** Baseline Demographic and Clinical Characteristics by CD25 Expression in the Entire E1900 Cohort

**Supplemental Table 2:** Gene Signature Table with Differentially Expressed Genes in CD25 Positive AML Blasts. List of differentially expressed genes between CD25 positive and CD25 negative cases at log2 fold change >1 and FDR < 0.01.

## Supplemental Figures

**Supplemental Figure 1:** Kaplan-Meier Estimates of Overall Survival, by CD25 Expression in E1900 Patients.

**Supplemental Figure 2:** Kaplan-Meier Estimates of Overall Survival for Intermediate-risk Patients by Cytogenetic Classification.

**Supplemental Figure 3:** Mutation Map for CD25 Positive Patients.

**Supplemental Figure 4:** Kaplan-Meier Estimates of Overall Survival by Mutation Status and Daunorubicin Dose, by CD25 Expression.

**Supplemental Tables**

Supplemental Table 1: Baseline Demographic and Clinical Characteristics by CD25 Expression in the Entire E1900 Cohort

|                                   | CD25 Negative<br>(n=570) | CD25 Positive<br>(n=87) | p-value |
|-----------------------------------|--------------------------|-------------------------|---------|
|                                   | Median (Range)           | Median (Range)          |         |
| Age                               | 48 (17-60)               | 48 (18-60)              | 0.66    |
| WBC (1000/mm <sup>3</sup> )       | 10.1 (0.6-366.0)         | 23.6 (0.8-181.0)        | <0.001  |
| Hemoglobin (g/dl)                 | 9.2 (4.6-30.0)           | 9.3 (5.1-12.7)          | 0.49    |
| Peripheral Blasts (%)             | 30 (0-90)                | 48.5 (0-94)             | 0.001   |
| Platelets (1000/mm <sup>3</sup> ) | 53.0 (0.7-995.0)         | 52.0 (3.9-261.0)        | 0.78    |
| Marrow Blast (%)                  | 64.5(3.0-100.0)          | 64.0(9.0-99.0)          | 0.88    |
|                                   | # Patients (%)           | # Patients (%)          |         |
| Female Sex                        | 271 (47.5%)              | 51 (58.6%)              | 0.07    |
| ECOG PS 0                         | 266 (67.7%)              | 38 (43.7%)              |         |
| 1                                 | 267 (46.8%)              | 40 (46.0%)              |         |
| 2+                                | 33 (5.8%)                | 8 (9.1%)                | 0.16    |
| Cytogenetics Favorable            | 87 (15.3%)               | 2 (2.3%)                | <0.0001 |
| Cytogenetics Intermediate         | 207 (36.3%)              | 80 (92.0%)              |         |
| Cytogenetics Unfavorable          | 117 (20.5%)              | 5 (5.7%)                |         |
| Secondary AML                     | 15 (2.6%)                | 7 (8.0%)                | 0.02    |

WBC, white blood cell count; PS, performance status; AML, acute myeloid leukemia;

Supplemental Table 2: Gene Signature Table with Differentially Expressed Genes in CD25 Positive AML Blasts. List of differentially expressed genes between CD25 positive and CD25 negative cases at log2 fold change >1 and FDR < 0.01.

| SEQ_ID            | ACCESSION | CHROM | STRAND | TXSTART   | TXEND     | SYMBOL   | DESCRIPTION                                         |                                                                                         |
|-------------------|-----------|-------|--------|-----------|-----------|----------|-----------------------------------------------------|-----------------------------------------------------------------------------------------|
| HSAP0406S00000157 | NM_198543 | chr1  | -      | 3003792   | 3007490   | MGC35434 | LOC148872 protein                                   | Homo sapiens LOC148872 protein (MGC35434), mRNA.                                        |
| HSAP0406S00001779 | NM_002959 | chr1  | -      | 109564233 | 109652605 | SORT1    | sortilin 1 preproprotein                            | Homo sapiens sortilin 1 (SORT1), mRNA.                                                  |
| HSAP0406S00002177 | NM_019032 | chr1  | +      | 147334957 | 147346481 | TSRC1    | thrombospondin repeat containing 1                  | Homo sapiens thrombospondin repeat                                                      |
| HSAP0406S00002179 | BC027478  | chr1  | +      | 147341015 | 147346481 | TSRC1    | TSRC1 protein                                       | Homo sapiens thrombospondin repeat containing 1, mRNA (cDNA clone IMAGE:5001173),       |
| HSAP0406S00004472 | NM_003494 | chr2  | +      | 71592414  | 71825547  | DYSF     | dysferlin                                           | Homo sapiens dysferlin, limb girdle muscular dystrophy 2B (autosomal recessive) (DYSF), |
| HSAP0406S00004473 | AK074104  | chr2  | +      | 71673833  | 71825547  | FLJ00175 | FLJ00175 protein                                    | Homo sapiens mRNA for FLJ00175 protein.                                                 |
| HSAP0406S00005562 | NM_004657 | chr2  | -      | 192525246 | 192537296 | SDPR     | serum deprivation response protein                  | Homo sapiens serum deprivation response (phosphatidylserine binding                     |
| HSAP0406S00005612 | NM_015535 | chr2  | +      | 200996301 | 201168758 | DNAPTP6  | DNA polymerase-transactivated protein 6             | Homo sapiens DNA polymerase-transactivated protein 6 (DNAPTP6), mRNA.                   |
| HSAP0406S00005613 | AF193059  | chr2  | +      | 200996936 | 201168758 | SP1224   | unknown                                             | Homo sapiens SP1224 mRNA, complete cds.                                                 |
| HSAP0406S00005785 | NM_000597 | chr2  | +      | 217323638 | 217354662 | IGFBP2   | insulin-like growth factor binding protein 2 (36kD) | Homo sapiens insulin-like growth factor binding protein 2 (36kD) (IGFBP2), mRNA.        |
| HSAP0406S00006956 | D87433    | chr3  | +      | 52504410  | 52533549  | KIAA0246 | KIAA0246 protein                                    | Homo sapiens mRNA for KIAA0246 protein, partial cds.                                    |
| HSAP0406S00006957 | AB052956  | chr3  | +      | 52504414  | 52533549  | FELE-1   | FELE-1                                              | Homo sapiens mRNA for FELE-1, complete cds.                                             |

|                   |           |      |   |           |           |          |                                            |                                                                                                                  |
|-------------------|-----------|------|---|-----------|-----------|----------|--------------------------------------------|------------------------------------------------------------------------------------------------------------------|
| HSAP0406S00007128 | BC031289  | chr3 | - | 71814670  | 71842326  | EIF4E3   | EIF4E3 protein                             | Homo sapiens eukaryotic translation initiation factor 4E member 3, mRNA (cDNA clone IMAGE:5299499), partial cds. |
| HSAP0406S00007130 | NM_021935 | chr3 | - | 71903496  | 71916902  | PROK2    | prokineticin 2                             | Homo sapiens prokineticin 2 (PROK2), mRNA.                                                                       |
| HSAP0406S00007258 | NM_001627 | chr3 | + | 106568879 | 106776709 | ALCAM    | activated leukocyte cell adhesion molecule | Homo sapiens activated leukocyte cell adhesion molecule (ALCAM), mRNA.                                           |
| HSAP0406S00007291 | NM_018189 | chr3 | - | 110527890 | 110539083 | DPPA4    | developmental pluripotency associated 4    | Homo sapiens developmental pluripotency associated 4 (DPPA4), mRNA.                                              |
| HSAP0406S00007585 | NM_007117 | chr3 | + | 131176260 | 131179478 | TRH      | thyrotropin-releasing hormone              | Homo sapiens thyrotropin-releasing hormone (TRH),                                                                |
| HSAP0406S00007761 | BC012613  | chr3 | + | 150065781 | 150097566 | CPA3     | mast cell carboxypeptidase A3, precursor   | Homo sapiens carboxypeptidase A3 (mast cell), mRNA (cDNA clone MGC:13637 IMAGE:4104766),                         |
| HSAP0406S00007812 | BC031063  | chr3 | - | 152637011 | 152641266 | IGSF10   | IGSF10 protein                             | Homo sapiens immunoglobulin superfamily, member 10, mRNA (cDNA clone IMAGE:5271204), complete cds.               |
| HSAP0406S00007815 | NM_178822 | chr3 | - | 152637174 | 152659195 | IGSF10   | immunoglobulin superfamily, member 10      | Homo sapiens immunoglobulin superfamily, member 10 (IGSF10), mRNA.                                               |
| HSAP0406S00008550 | BC009945  | chr4 | - | 25425396  | 25497831  | KIAA0746 | KIAA0746 protein                           | Homo sapiens KIAA0746 protein, mRNA (cDNA clone IMAGE:4123572), partial cds.                                     |
| HSAP0406S00008551 | NM_015187 | chr4 | - | 25425318  | 25540713  | KIAA0746 | KIAA0746 protein                           | Homo sapiens KIAA0746 protein (KIAA0746), mRNA.                                                                  |
| HSAP0406S00008552 | AB018289  | chr4 | - | 25425329  | 25525610  | KIAA0746 | KIAA0746 protein                           | Homo sapiens mRNA for KIAA0746 protein, partial cds.                                                             |

|                   |           |      |   |           |           |                |                                                                     |                                                                                                                                       |
|-------------------|-----------|------|---|-----------|-----------|----------------|---------------------------------------------------------------------|---------------------------------------------------------------------------------------------------------------------------------------|
| HSAP0406S00008732 | BC022514  | chr4 | - | 57516954  | 57528825  | SPINK2         | serine protease inhibitor, Kazal type 2 (acrosin-trypsin inhibitor) | Homo sapiens serine protease inhibitor, Kazal type 2 (acrosin-trypsin inhibitor), mRNA (cDNA clone MGC:26562 IMAGE:4812189), complete |
| HSAP0406S00008798 | NM_144646 | chr4 | - | 71886718  | 71897299  | IGJ            | immunoglobulin J chain                                              | Homo sapiens immunoglobulin J polypeptide, linker protein for immunoglobulin alpha and mu polypeptides (IGJ), mRNA.                   |
| HSAP0406S00008840 | NM_002090 | chr4 | - | 75267348  | 75269525  | CXCL3          | chemokine (C-X-C motif) ligand 3                                    | Homo sapiens chemokine (C-X-C motif) ligand 3 (CXCL3),                                                                                |
| HSAP0406S00009434 | Y15723    | chr4 | + | 156945482 | 157009379 | sGC            | soluble guanylyl cyclase                                            | Homo sapiens mRNA for soluble guanylyl cyclase.                                                                                       |
| HSAP0406S00009912 | NM_005410 | chr5 | - | 42835746  | 42847717  | SEPP1          | selenoprotein P precursor                                           | Homo sapiens selenoprotein P, plasma, 1 (SEPP1), mRNA.                                                                                |
| HSAP0406S00011216 | BC027302  | chr5 | - | 179961128 | 179962286 | LOC285682      | LOC285682 protein                                                   | Homo sapiens hypothetical protein LOC285682, mRNA (cDNA clone IMAGE:4212883),                                                         |
| HSAP0406S00011217 | S66407    | chr5 | - | 179962797 | 179968590 | FLT4           | receptor tyrosine kinase isoform FLT4 long                          | FLT4=receptor tyrosine kinase isoform FLT4 long {3' region, alternatively spliced} [human, mRNA Partial, 216 nt].                     |
| HSAP0406S00012409 | BX641095  | chr6 | + | 74462642  | 74590174  | DKFZp686N23150 | hypothetical protein                                                | Homo sapiens mRNA                                                                                                                     |
| HSAP0406S00012807 | NM_004666 | chr6 | - | 133044422 | 133076881 | VNN1           | vanin 1 precursor                                                   | Homo sapiens vanin 1 (VNN1), mRNA.                                                                                                    |
| HSAP0406S00013480 | NM_019102 | chr7 | - | 26954235  | 26956527  | HOXA5          | homeobox protein A5                                                 | Homo sapiens homeo box A5 (HOXA5), mRNA.                                                                                              |
| HSAP0406S00013483 | NM_152739 | chr7 | - | 26975297  | 26978389  | HOXA9          | homeobox protein A9 isoform a                                       | Homo sapiens homeo box A9 (HOXA9), transcript variant 1, mRNA.                                                                        |
| HSAP0406S00013484 | NM_018951 | chr7 | - | 26983450  | 26987163  | HOXA10         | homeobox protein A10 isoform a                                      | Homo sapiens homeo box A10 (HOXA10), transcript variant 1, mRNA.                                                                      |

|                   |            |       |   |           |           |         |                                                    |                                                                                      |
|-------------------|------------|-------|---|-----------|-----------|---------|----------------------------------------------------|--------------------------------------------------------------------------------------|
| HSAP0406S00013485 | NM_153715  | chr7  | - | 26983450  | 26993083  | HOXA10  | homeobox protein A10 isoform b                     | Homo sapiens homeo box A10 (HOXA10), transcript variant 2, mRNA.                     |
| HSAP0406S00013498 | NM_019029  | chr7  | - | 28808492  | 28959353  | CPVL    | serine carboxypeptidase vitellogenic-like          | Homo sapiens carboxypeptidase, vitellogenic-like (CPVL), transcript variant 2,       |
| HSAP0406S00015750 | NM_018407  | chr8  | + | 98856984  | 98933998  | LAPTM4B | lysosomal-associated transmembrane protein 4 beta  | Homo sapiens lysosomal associated protein transmembrane 4 beta                       |
| HSAP0406S00015751 | AJ276485   | chr8  | + | 98857341  | 98933998  | LC27    | integral membrane transporter protein              | Homo sapiens mRNA for putative integral membrane transporter protein (LC27           |
| HSAP0406S00015866 | NM_006209  | chr8  | - | 120638506 | 120720251 | ENPP2   | ectonucleotide pyrophosphatase/phosphodiesterase 2 | Homo sapiens ectonucleotide pyrophosphatase/phosphodiesterase 2 (autotaxin) (ENPP2), |
| HSAP0406S00016747 | NM_000689  | chr9  | - | 72745141  | 72797523  | ALDH1A1 | aldehyde dehydrogenase 1A1                         | Homo sapiens aldehyde dehydrogenase 1 family, member A1 (ALDH1A1), mRNA.             |
| HSAP0406S00017066 | NM_080546  | chr9  | + | 105086662 | 105233235 | CDW92   | CDW92 antigen                                      | Homo sapiens CDW92 antigen (CDW92), mRNA.                                            |
| HSAP0406S00017067 | BC018213   | chr9  | + | 105208200 | 105232183 | CDW92   | CDW92 protein                                      | Homo sapiens CDW92 antigen, mRNA (cDNA clone IMAGE:3882479), partial cds.            |
| HSAP0406S00017533 | NM_0010022 | chr9  | + | 131001465 | 131028093 | C9orf58 | chromosome 9 open reading frame 58 isoform 2       | Homo sapiens chromosome 9 open reading frame 58 (C9orf58), transcript variant 2,     |
| HSAP0406S00017894 | NM_000417  | chr10 | - | 6093511   | 6144278   | IL2RA   | interleukin 2 receptor, alpha chain precursor      | Homo sapiens interleukin 2 receptor, alpha (IL2RA), mRNA.                            |
| HSAP0406S00017997 | NM_002438  | chr10 | + | 17891367  | 17993183  | MRC1    | mannose receptor C type 1 precursor                | Homo sapiens mannose receptor, C type 1 (MRC1),                                      |
| HSAP0406S00017998 | NM_002438  | chr10 | + | 18138357  | 18240096  | MRC1    | mannose receptor C type 1 precursor                | Homo sapiens mannose receptor, C type 1 (MRC1),                                      |



|                   |           |       |   |           |           |          |                                                 |                                                                               |
|-------------------|-----------|-------|---|-----------|-----------|----------|-------------------------------------------------|-------------------------------------------------------------------------------|
| HSAP0406S00018221 | BC004376  | chr10 | - | 46577996  | 46594046  | ANXA8    | annexin A8                                      | Homo sapiens annexin A8, mRNA (cDNA clone MGC:10570 IMAGE:3639064), complete  |
| HSAP0406S00018223 | BC004376  | chr10 | + | 47216995  | 47233039  | ANXA8    | annexin A8                                      | Homo sapiens annexin A8, mRNA (cDNA clone MGC:10570 IMAGE:3639064), complete  |
| HSAP0406S00018227 | BC004376  | chr10 | + | 47875312  | 47891367  | ANXA8    | annexin A8                                      | Homo sapiens annexin A8, mRNA (cDNA clone MGC:10570 IMAGE:3639064), complete  |
| HSAP0406S00018850 | NM_145285 | chr10 | + | 101282699 | 101286268 | NKX2-3   | NK2 transcription factor related, locus 3       | Homo sapiens NK2 transcription factor related, locus 3 (Drosophila) (NKX2-3), |
| HSAP0406S00019211 | NM_001380 | chr10 | + | 128658954 | 129140769 | DOCK1    | dedicator of cytokinesis 1                      | Homo sapiens dedicator of cytokinesis 1 (DOCK1), mRNA.                        |
| HSAP0406S00021250 | NM_153206 | chr11 | - | 117569887 | 117589284 | AMICA    | adhesion molecule AMICA                         | Homo sapiens adhesion molecule AMICA (AMICA),                                 |
| HSAP0406S00021925 | U21551    | chr12 | - | 24862208  | 24946087  | ECA39    | N/A                                             | Human ECA39 mRNA,                                                             |
| HSAP0406S00022829 | NM_003877 | chr12 | + | 92466065  | 92472446  | SOCS2    | suppressor of cytokine signaling-2              | Homo sapiens suppressor of cytokine signaling 2 (SOCS2),                      |
| HSAP0406S00023979 | NM_024089 | chr13 | - | 102234632 | 102249358 | KDEL1    | KDEL (Lys-Asp-Glu-Leu) containing 1             | Homo sapiens KDEL (Lys-Asp-Glu-Leu) containing 1 (KDEL1),                     |
| HSAP0406S00024319 | NM_001911 | chr14 | - | 24112563  | 24115306  | CTSG     | cathepsin G preproprotein                       | Homo sapiens cathepsin G (CTSG), mRNA.                                        |
| HSAP0406S00024524 | NM_000161 | chr14 | - | 54378484  | 54439279  | GCH1     | GTP cyclohydrolase 1 (dopa-responsive dystonia) | Homo sapiens GTP cyclohydrolase 1 (dopa-responsive dystonia) (GCH1),          |
| HSAP0406S00025293 | NM_014792 | chr14 | + | 105461656 | 105469554 | KIAA0125 | KIAA0125 gene product                           | Homo sapiens KIAA0125 (KIAA0125), mRNA.                                       |
| HSAP0406S00025500 | NM_003246 | chr15 | + | 37660571  | 37676959  | THBS1    | thrombospondin 1 precursor                      | Homo sapiens thrombospondin 1 (THBS1),                                        |
| HSAP0406S00025666 | NM_002373 | chr15 | + | 41597132  | 41611109  | MAP1A    | microtubule-associated protein 1A               | Homo sapiens microtubule-associated protein 1A (MAP1A), mRNA.                 |

|                   |           |       |   |          |          |                |                                                    |                                                                                                                      |
|-------------------|-----------|-------|---|----------|----------|----------------|----------------------------------------------------|----------------------------------------------------------------------------------------------------------------------|
| HSAP0406S00026591 | BC003512  | chr16 | + | 750767   | 758866   | MSLN           | megakaryocyte<br>potentiating factor,<br>precursor | Homo sapiens mesothelin,<br>transcript variant 1, mRNA<br>(cDNA clone MGC:10686<br>IMAGE:3611296), complete          |
| HSAP0406S00026616 | NM_012217 | chr16 | + | 1246273  | 1248495  | TPSD1          | tryptase delta 1                                   | Homo sapiens tryptase delta 1<br>(TPSD1), mRNA.                                                                      |
| HSAP0406S00027488 | NM_004530 | chr16 | + | 54070603 | 54097652 | MMP2           | matrix<br>metalloproteinase 2<br>preproprotein     | Homo sapiens matrix<br>metalloproteinase 2 (gelatinase<br>A, 72kDa gelatinase, 72kDa<br>type IV collagenase) (MMP2), |
| HSAP0406S00027569 | NM_201524 | chr16 | + | 56220041 | 56256445 | GPR56          | G protein-coupled<br>receptor 56 isoform b         | Homo sapiens G protein-<br>coupled receptor 56 (GPR56),<br>transcript variant 2, mRNA.                               |
| HSAP0406S00027570 | NM_170776 | chr16 | + | 56259671 | 56280789 | GPR97          | G protein-coupled<br>receptor 97                   | Homo sapiens G protein-<br>coupled receptor 97 (GPR97),                                                              |
| HSAP0406S00028298 | NM_182538 | chr17 | + | 4283967  | 4338247  | MGC29671       | hypothetical protein<br>MGC29671                   | Homo sapiens hypothetical<br>protein MGC29671                                                                        |
| HSAP0406S00028299 | BC023646  | chr17 | + | 4284015  | 4338247  | MGC29671       | MGC29671 protein                                   | Homo sapiens hypothetical<br>protein MGC29671, mRNA<br>(cDNA clone MGC:29671<br>IMAGE:5087991), complete             |
| HSAP0406S00029491 | U59298    | chr17 | - | 43982349 | 43986269 | HOXB3          | hox homeobox<br>transcription factor<br>HOXB3      | Human hox homeobox<br>transcription factor (HOXB3)<br>mRNA, complete cds.                                            |
| HSAP0406S00029492 | NM_024015 | chr17 | - | 44007874 | 44010742 | HOXB4          | homeo box B4                                       | Homo sapiens homeo box B4<br>(HOXB4), mRNA.                                                                          |
| HSAP0406S00029493 | M92299    | chr17 | - | 44023618 | 44026322 | HOX2A          | homeobox protein                                   | Human homeobox 2.1 protein<br>(HOX2A) mRNA, complete cds.                                                            |
| HSAP0406S00029604 | NM_005486 | chr17 | + | 50333202 | 50394309 | TOM1L1         | target of myb1-like 1                              | Homo sapiens target of myb1-<br>like 1 (chicken) (TOM1L1),                                                           |
| HSAP0406S00029646 | NM_006151 | chr17 | + | 53670846 | 53700878 | LPO            | lactoperoxidase                                    | Homo sapiens lactoperoxidase<br>(LPO), mRNA.                                                                         |
| HSAP0406S00029647 | BX538344  | chr17 | + | 53681457 | 53700794 | DKFZp686G24255 | hypothetical protein                               | Homo sapiens mRNA                                                                                                    |

|                   |            |       |   |           |           |                |                                                               |                                                                                                    |
|-------------------|------------|-------|---|-----------|-----------|----------------|---------------------------------------------------------------|----------------------------------------------------------------------------------------------------|
| HSAP0406S00030121 | NM_005567  | chr17 | - | 74478931  | 74487656  | LGALS3BP       | galectin 3 binding protein                                    | Homo sapiens lectin, galactoside-binding, soluble, 3 binding protein (LGALS3BP),                   |
| HSAP0406S00030392 | NM_006868  | chr18 | + | 9698302   | 9852547   | RAB31          | RAB31, member RAS oncogene family                             | Homo sapiens RAB31, member RAS oncogene family (RAB31),                                            |
| HSAP0406S00030688 | NM_003199  | chr18 | - | 51045966  | 51406441  | TCF4           | transcription factor 4 isoform b                              | Homo sapiens transcription factor 4 (TCF4), mRNA.                                                  |
| HSAP0406S00031124 | NM_020209  | chr19 | + | 4230658   | 4241720   | SHD            | src homology 2 domain-containing transforming protein D       | Homo sapiens src homology 2 domain-containing transforming protein D (SHD),                        |
| HSAP0406S00031248 | NM_001974  | chr19 | + | 6838581   | 6891463   | EMR1           | egf-like module containing, mucin-like, hormone receptor-like | Homo sapiens egf-like module containing, mucin-like, hormone receptor-like 1                       |
| HSAP0406S00035974 | NM_0010053 | chrX  | + | 51469733  | 51478484  | MAGED1         | melanoma antigen, family D, 1 isoform a                       | Homo sapiens melanoma antigen, family D, 1 (MAGED1), transcript variant 1, mRNA.                   |
| HSAP0406S00036380 | NM_033381  | chrX  | + | 107489298 | 107746920 | COL4A5         | alpha 5 type IV collagen isoform 3, precursor                 | Homo sapiens collagen, type IV, alpha 5 (Alport syndrome) (COL4A5), transcript variant 3,          |
| HSAP0406S00036381 | M58526     | chrX  | + | 107613275 | 107745753 | COL4A5         | alpha-5 type IV collagen                                      | Human alpha-5 collagen type IV (COL4A5) mRNA, 3' end.                                              |
| HSAP0406S00036590 | NM_001449  | chrX  | + | 134955199 | 135019028 | FHL1           | four and a half LIM domains 1                                 | Homo sapiens four and a half LIM domains 1 (FHL1), mRNA.                                           |
| HSAP0406S00036702 | NM_007150  | chrX  | + | 151757232 | 151812583 | ZNF185         | zinc finger protein 185 (LIM domain)                          | Homo sapiens zinc finger protein 185 (LIM domain)                                                  |
| HSAP0406S00036703 | BX640940   | chrX  | + | 151759471 | 151812583 | DKFZp686B22130 | hypothetical protein                                          | Homo sapiens mRNA                                                                                  |
| HSAP0406S00036704 | BX537525   | chrX  | + | 151770641 | 151812589 | DKFZp686O1389  | hypothetical protein                                          | Homo sapiens mRNA                                                                                  |
| HSAP0406S00036818 | BC005367   | chrX  | - | 154070161 | 154127570 | CLIC2          | CLIC2 protein                                                 | Homo sapiens chloride intracellular channel 2, mRNA (cDNA clone MGC:12482 IMAGE:3930673), complete |
| HSAP0406S00036819 | NM_001289  | chrX  | - | 154070159 | 154127661 | CLIC2          | chloride intracellular channel 2                              | Homo sapiens chloride intracellular channel 2 (CLIC2),                                             |

**Supplemental Figures**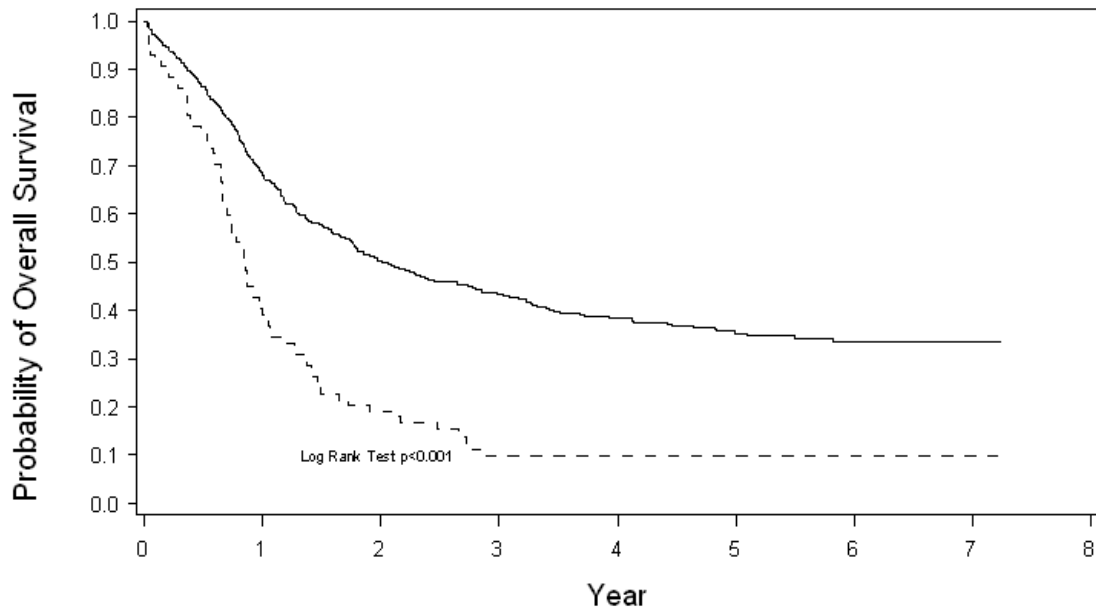

**Supplemental Figure 1:** Kaplan-Meier Estimates of Overall Survival, by CD25 Expression in E1900 Patients. Data from the intention-to-treat analysis are shown for the entire E1900 cohort (n=657). CD25 negative patients are depicted in the solid curve (N=570), while CD25 positive patients are depicted as a dashed curve (N=87).

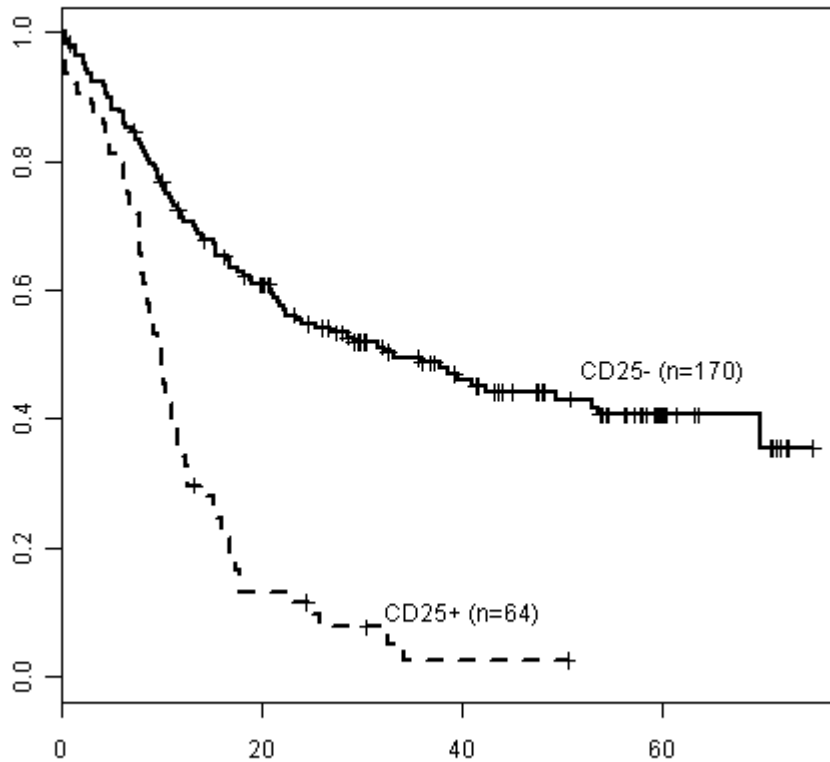

**Supplemental Figure 2:** Kaplan-Meier Estimates of Overall Survival for Intermediate-risk Patients by Cytogenetic Classification. Data are shown for cytogenetically intermediate-risk patients either lacking CD25 (solid line, N=170) or expressing CD25 (dashed line, N=64).

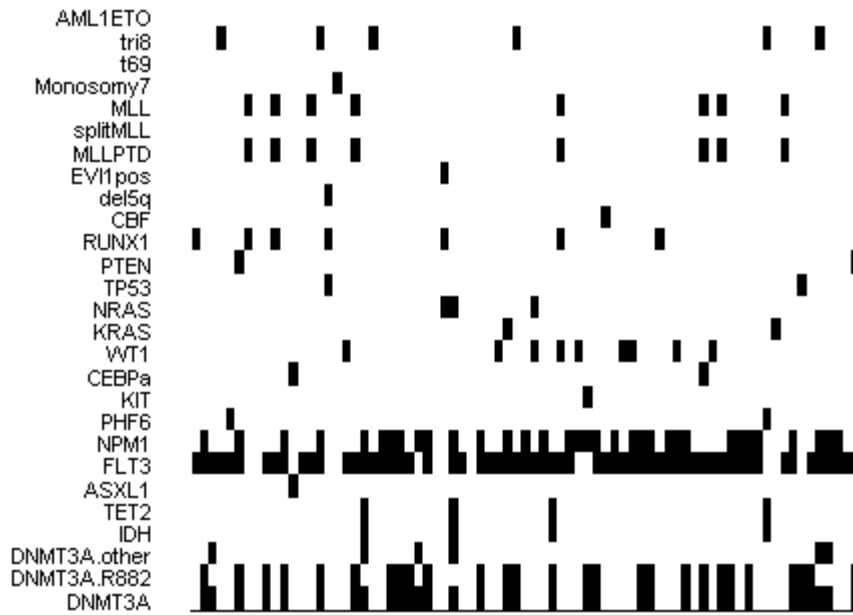

**Supplemental Figure 3:** Mutation Map for CD25 Positive Patients. Data are depicted for all CD25 positive patients (N=75). Each column is a patient and each row is one of the 27 mutations analyzed. Black denotes mutation and white denotes wild type.

**Supplemental Figure 4A:**

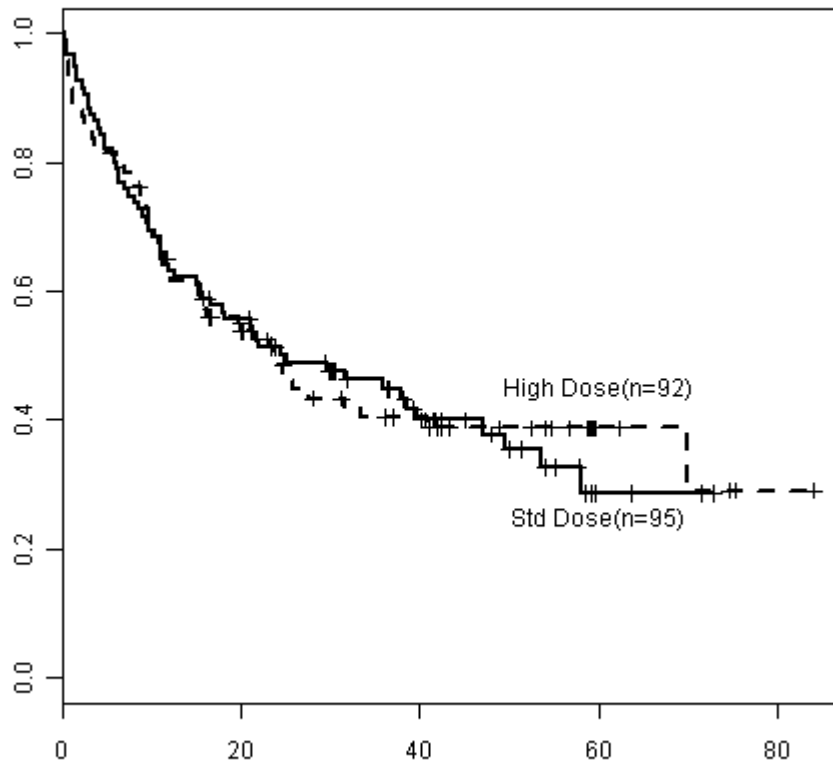

**Supplemental Figure 4B:**

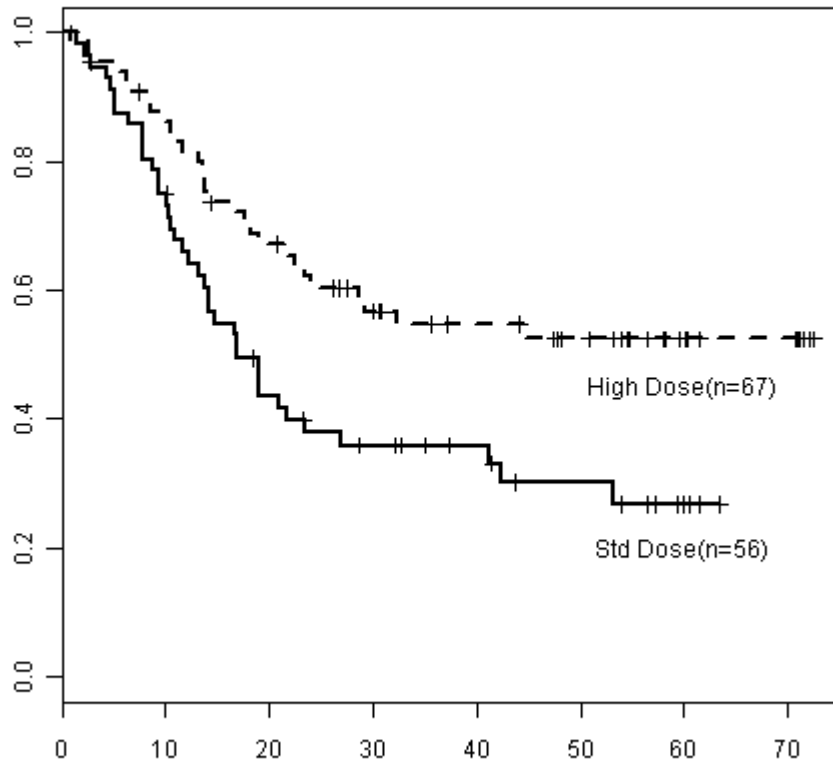



**Supplemental Figure 4C:**

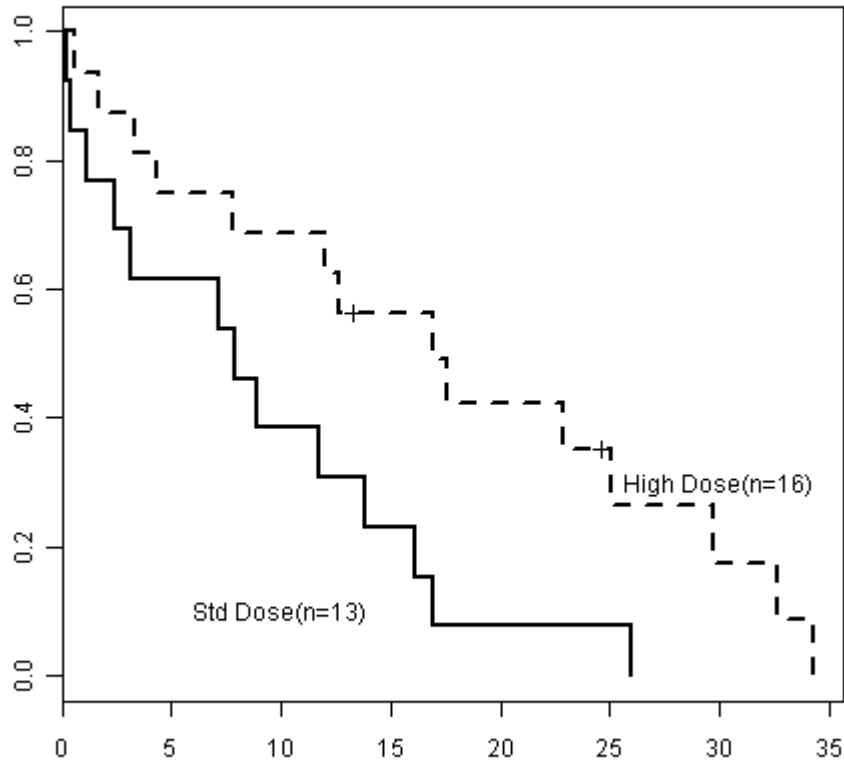

**Supplemental Figure 4D:**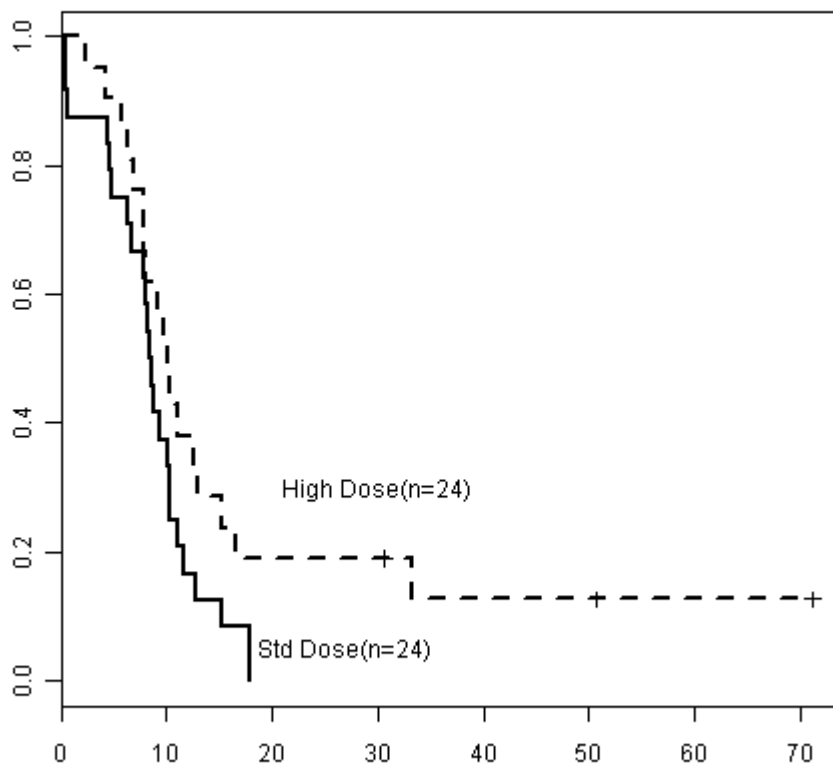

**Supplemental Figure 4:** Kaplan-Meier Estimates of Overall Survival by Mutation Status and Daunorubicin Dose. In each panel, the solid line represents high-dose daunorubicin, while the dashed line represents standard-dose daunorubicin. Data are shown for CD25 negative patients (Panel A and B), wild-type for DNMT3A and NPM1, and without chromosome translocations involving the MLL gene (SDD: N=95, HDD: N=92) ( $p=0.931$ ) (**Panel A**) or with at least one mutation in DNMT3A or NPM1

or with MLL translocation (SDD: N=56, HDD: N=67) ( $p=0.006$ ) (**Panel B**). In Panel C and D, data are depicted for CD25 positive patients who were either wild-type for DNMT3A and NPM1 (SDD: N=13, HDD: N=16) ( $p=0.002$ ) (**Panel C**) or with at least one mutation in DNMT3A or NPM1 (SDD: N=24, HDD: N=21) ( $p=0.067$ ) (**Panel D**). None of the CD25 positive patients had chromosomal translocations involving the MLL gene.
